# Supplementary material
Source: bioRxiv or medRxiv preprint supplement (https://medrxiv.org/highwire/filestream/78539/field_highwire_adjunct_files/0/2020.04.24.20078741-1.pdf)
Supplement: Supplementary file [file 2020.04.24.20078741-1.pdf]

## SUPPLEMENTAL MATERIAL

**Table S1** PK parameters used for CQ modelling in human plasma and lung.

| Parameter                | Value used in Simulation | Source                                                                                        |
|--------------------------|--------------------------|-----------------------------------------------------------------------------------------------|
| $k_a$ ( $h^{-1}$ )       | 1                        | Karunajeewa et al. (1)                                                                        |
| CL/F (L/h/kg)            | 28.2                     |                                                                                               |
| $V_c/F$ (L/kg)           | 2702                     |                                                                                               |
| $V_p/F$ (L/kg)           | 3781                     |                                                                                               |
| Q/F (L/h/kg)             | 20                       |                                                                                               |
| $Q_{lung\_in}$ (L/h)     | 0.394                    | From rat lung model                                                                           |
| $Q_{lung\_out}$ (L/h)    | $1.84 \cdot 10^{-3}$     | From rat lung model                                                                           |
| Apparent Lung Volume (L) | 0.083                    | Calculated:<br>$\left( \frac{V_{lung[RAT]}}{V_{plasma[RAT]}} \right) \cdot V_{plasma[HUMAN]}$ |

**Table S2** Rat PK parameters estimated from data reported in Adelus et al. 1988

| Parameter                | Value estimate                             | % RSE |
|--------------------------|--------------------------------------------|-------|
| $k_a$ ( $h^{-1}$ )       | 10 [fixed]                                 | -     |
| CL/F (L/h/kg)            | 1.99                                       | 10.7% |
| $V_c/F$ (L/kg)           | 68.3                                       | 5.01% |
| $V_p/F$ (L/kg)           | 44.6                                       | 39.7% |
| Q/F (L/h/kg)             | 2.99                                       | 33.2% |
| $Q_{lung\_in}$ (L/h)     | $9.9718 \cdot 10^{-3}$                     | 23.7% |
| $Q_{lung\_out}$ (L/h)    | $4.66 \cdot 10^{-5}$                       | 26.9% |
| Apparent Lung Volume (L) | 0.0021 (fixed to physiological volume (2)) | -     |

**Table S3** Physicochemical properties and in vitro data of CQ experimentally derived or obtained from the literature

| Parameter        | Value (CQ)       |
|------------------|------------------|
| Molecular weight | 319.872 (3)      |
| $\log P_{o:w}^a$ | 4.63             |
| Protein binding  | 60% (4)          |
| $pK_a^b$         | 10.1, 8.1 (5)    |
| $R^c$            | 3.5 (6)          |
| Plasma clearance | 0.675 L/h/kg (3) |

**a-**  $\log P_{o:w}$  – Partition coefficient between octanol and water.

**b-**  $pK_a$  – logarithmic value of the dissociation constant.

**c-**  $R$  – blood-to-plasma drug ratio.

**Table S4** anti SARS-CoV-2 pharmacodynamic parameters used for CQ

| Parameter             | Value estimate | Reference       |
|-----------------------|----------------|-----------------|
| $E_{max}$ (%)         | 100            | Wang et al. (7) |
| $EC_{50}$ [ $\mu M$ ] | 1.13           |                 |
| hill                  | 1.23           |                 |

## REFERENCES

- (1) Karunajeewa, H.A. *et al.* Pharmacokinetics of chloroquine and monodesethylchloroquine in pregnancy. *Antimicrob Agents Chemother* **54**, 1186-92 (2010).
- (2) Davies, B. & Morris, T. Physiological parameters in laboratory animals and humans. *Pharm Res* **10**, 1093-5 (1993).
- (3) DrugBank. *Chloroquine*. <<https://www.drugbank.ca/drugs/DB00608>> (2020). Accessed 14/04/2020 2020.
- (4) Ofori-Adjei, D., Ericsson, O., Lindstrom, B. & Sjoqvist, F. Protein binding of chloroquine enantiomers and desethylchloroquine. *British Journal of Clinical Pharmacology* **22**, 356-8 (1986).
- (5) Daniel, W.A., Bickel, M.H. & Honegger, U.E. The Contribution of Lysosomal Trapping in the Uptake of Desipramine and Chloroquine by Different Tissues. *Pharmacology & Toxicology* **77**, 402-6 (1995).
- (6) Charman, S.A. *et al.* An in vitro toolbox to accelerate anti-malarial drug discovery and development. *Malar J* **19**, 1 (2020).
- (7) Wang, M. *et al.* Remdesivir and chloroquine effectively inhibit the recently emerged novel coronavirus (2019-nCoV) in vitro. *Cell Res* **30**, 269-71 (2020).
